# Supplementary material for: Isobolographic Analysis Demonstrates the Additive and Synergistic Effects of Gemcitabine Combined with Fucoidan in Uterine Sarcomas and Carcinosarcoma Cells
Source: MDPI journal article supplement (doi:10.3390/cancers12010107), 2019-12-31
Supplement: s1 [file s1]

## Supplementary Materials: Isobolographic Analysis Demonstrates the Additive and Synergistic Effects of Gemcitabine Combined with Fucoidan in Uterine Sarcomas and Carcinosarcoma Cells

**Suppl. Table S1.** Anti-proliferative effects of gemcitabine (GEM) and fucoidan (FUK) administered singly in cancer cell lines ESS-1, SKUT-1, SKUT-1B and MES-SA, as measured *in vitro* by the MTT assay.

| Cell line | Drug | IC <sub>50</sub> (µg/ml) | <i>n</i> |
|-----------|------|--------------------------|----------|
| SKUT-1    | GEM  | 31.173 ± 5.608           | 30       |
| SKUT-1    | FUK  | 0.966 ± 0.541            | 24       |
| SKUT-1B   | GEM  | 25.243 ± 7.522           | 24       |
| SKUT-1B   | FUK  | 3.348 ± 2.317            | 24       |
| ESS-1     | GEM  | 13.875 ± 2.207           | 24       |
| ESS-1     | FUK  | 0.848 ± 1.129            | 30       |
| MES-SA    | GEM  | 72.482 ± 26.070          | 30       |
| MES-SA    | FUK  | N.D.                     |          |

Median inhibitory concentrations (IC<sub>50</sub> values in µg/ml ± S.E.M.) of GEM and FUK were determined experimentally in various cancer cell lines. *n* – total number of items used at those concentrations whose expected anti-proliferative effects ranged between 4 and 6 probits (16% and 84%). The results for fucoidan (FUK) have been previously published by our team [10].

**Suppl. Table S2.** Type I isobolographic analysis of interactions (for non-parallel dose-response effects) between gemcitabine (GEM) and fucoidan (FUK) in three cancer cell lines ESS-1, SKUT-1 and SKUT-1B, as measured *in vitro* by the MTT assay.

| Cell line      | Combination             | IC <sub>50 mix</sub> (µg/ml) | <i>n</i> <sub>mix</sub> | <sup>1</sup> IC <sub>50 add</sub> (µg/ml) | <i>n</i> <sub>add</sub> | <sup>1</sup> IC <sub>50 add</sub> |
|----------------|-------------------------|------------------------------|-------------------------|-------------------------------------------|-------------------------|-----------------------------------|
| (µg/ml)        | <i>n</i> <sub>add</sub> |                              |                         |                                           |                         |                                   |
| ESS-1          | GEM+FUK                 | 0.101 ± 0.052                | 24                      | 2.508 ± 2.164                             | 50                      |                                   |
| 12.215 ± 2.270 | 50                      |                              |                         |                                           |                         |                                   |
| SKUT-1         | GEM+FUK                 | 9.016 ± 2.493                | 30                      | 4.850 ± 6.082                             | 50                      | 27.290 ± 7.093                    |
| 50             |                         |                              |                         |                                           |                         |                                   |
| SKUT-1B        | GEM+FUK                 | 4.713 ± 1.714                | 30                      | 10.728 ± 4.748                            | 44                      | 17.866 ± 6.619                    |
| 44             |                         |                              |                         |                                           |                         |                                   |

Median inhibitory concentrations (IC<sub>50</sub> values in µg/ml ± S.E.M.) for the mixture of GEM+FUK were determined both, experimentally (IC<sub>50 mix</sub>) and theoretically calculated (IC<sub>50 add</sub>) from the equations of additivity for a 50% inhibition of cell proliferation in three cancer cell lines ESS-1, SKUT-1 and SKUT-1B. *n*<sub>mix</sub> – total number of items used at those concentrations whose expected anti-proliferative effects ranged between 16% and 84% (i.e., 4 and 6 probits) for the experimental mixture; *n*<sub>add</sub> – total number of animals calculated for the additive mixture of the drugs examined (*n*<sub>add</sub> = *n*<sub>GEM</sub> + *n*<sub>FUK</sub> – 4); <sup>1</sup>IC<sub>50 add</sub>

and  $^{U}IC_{50\text{ add}}$  – are  $IC_{50}$  values (in  $\mu\text{g/ml} \pm \text{S.E.M.}$ ) calculated from the equations for the lower and upper isoboles of additivity, respectively. The unpaired Student's *t*-test was used to statistically analyze the data.

**Suppl. Table S3.** Statistical significance of differences in percents of cells in each cell cycle phases among cells treated with gemcitabine or mixture (gemcitabine and fucoidan) and control (no treatment). The results were analyzed by one-way ANOVA test, Tukey's Multiple Comparison Post-test,  $p < 0.05$  was considered as statistically significant. The results of experiment are presented on figure 7.

| Cell line                    | Cell cycle phase |         |         |         |
|------------------------------|------------------|---------|---------|---------|
|                              | pre G1           | G0/G1   | S       | G2      |
| SK-UT-1                      |                  |         |         |         |
| control vs GEM               | p<0.01           | NS      | p<0.05  | p<0.05  |
| control vs 0.5 IC50 FUK+GEM  | NS               | NS      | p<0.01  |         |
| GEM vs 0.5 IC50 FUK+GEM      | p<0.05           | NS      | p<0.001 |         |
| SK-UT-1B                     |                  |         |         |         |
| control vs GEM               | NS               | NS      | p<0.05  | p<0.001 |
| control vs 0.5 IC50 FUK+GEM  | p<0.001          | p<0.001 | p<0.001 |         |
| GEM vs 0.5 IC50 FUK+GEM      |                  |         |         |         |
| ESS-1                        |                  |         |         |         |
| control vs GEM               | p<0.001          | p<0.01  | p<0.05  | p<0.001 |
| control vs 0.05 IC50 FUK+GEM | NS               | NS      | p<0.01  |         |
| GEM vs 0.05 IC50 FUK+GEM     | NS               | NS      | NS      |         |

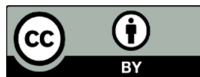

© 2020 by the authors. Submitted for possible open access publication under the terms and conditions of the Creative Commons Attribution (CC BY) license (<http://creativecommons.org/licenses/by/4.0/>).
